# Supplementary material for: Serglycin secreted by late-stage nucleus pulposus cells is a biomarker of intervertebral disc degeneration
Source: Nat Commun. 2024 Jan 2;15:47. doi: 10.1038/s41467-023-44313-9 (PMC10761730; doi:10.1038/s41467-023-44313-9)
Supplement: Supplementary file 1 — Supplementary Information [file 41467_2023_44313_MOESM1_ESM.pdf]

**Supplementary Information on**  
**Serglycin secreted by late-stage nucleus pulposus cells is a biomarker**  
**of intervertebral disc degeneration**

Fan Chen<sup>1, 2, 3†</sup>; Linchuan Lei<sup>1, 2, 3†</sup>; Shunlun Chen<sup>1, 2†</sup>; Zhuoyang Zhao<sup>1, 2, 3†</sup>; Yuming Huang<sup>1, 2</sup>; Guowei Jiang<sup>1, 2, 3</sup>; Xingyu Guo<sup>1, 2</sup>; Zemin Li<sup>1, 2</sup>; Zhaomin Zheng<sup>1, 2 \*</sup>; and Jianru Wang<sup>1, 2 \*</sup>

<sup>1</sup>Department of Spine Surgery, The First Affiliated Hospital of Sun Yat-sen University, Guangzhou 510080, P.R. China

<sup>2</sup>Guangdong Province Key Laboratory of Orthopaedics and Traumatology, Guangzhou, 510080, P.R. China

<sup>3</sup>Laboratory of General Surgery, The First Affiliated Hospital, Sun Yat-sen University, Guangzhou 510080, China

<sup>†</sup>These four authors contributed equally to this work.

\*Corresponding author:

Jianru Wang

Email: [wangjru@mail.sysu.edu.cn](mailto:wangjru@mail.sysu.edu.cn)

Telephone: +8613560182502

Fax: +862087332150

Address: No. 58, Zhongshan 2nd Road, Guangzhou, China 510080

Zhaomin Zheng

Email: [zhzhaom@mail.sysu.edu.cn](mailto:zhzhaom@mail.sysu.edu.cn)

Telephone: +8613925187872

Fax: +862087332150

Address: No. 58, Zhongshan 2nd Road, Guangzhou, China 510080

## Supplementary Tables

**Supplementary Table 1. The number and ratios % of cells sequenced for each patient and the each cell type**

| Clusters        | Samples |       |       |       |       |       |       | Sum    | Proposition (%) | Celltype    |
|-----------------|---------|-------|-------|-------|-------|-------|-------|--------|-----------------|-------------|
|                 | 1       | 2     | 3     | 4     | 5     | 6     | 7     |        |                 |             |
| 0               | 1144    | 295   | 1951  | 2033  | 822   | 387   | 134   | 6766   | 12.67           | NP          |
| 1               | 581     | 480   | 780   | 847   | 1094  | 933   | 1030  | 5745   | 10.76           | NP          |
| 2               | 53      | 191   | 188   | 20    | 113   | 1151  | 3699  | 5415   | 10.14           | NP          |
| 3               | 714     | 51    | 1557  | 1968  | 73    | 266   | 176   | 4805   | 9.00            | NP          |
| 4               | 77      | 88    | 345   | 151   | 2188  | 983   | 222   | 4054   | 7.59            | NP          |
| 5               | 2026    | 82    | 511   | 1280  | 52    | 17    | 82    | 4050   | 7.58            | NP          |
| 6               | 285     | 299   | 238   | 178   | 444   | 950   | 1620  | 4014   | 7.52            | NP          |
| 7               | 429     | 823   | 401   | 666   | 519   | 859   | 106   | 3803   | 7.12            | NP          |
| 8               | 1       | 35    | 28    | 2     | 0     | 2023  | 136   | 2225   | 4.17            | NP          |
| 9               | 11      | 1463  | 260   | 24    | 3     | 118   | 64    | 1943   | 3.64            | T&B         |
| 10              | 4       | 1462  | 206   | 17    | 2     | 1     | 2     | 1694   | 3.17            | Neutrophil  |
| 11              | 0       | 1496  | 120   | 4     | 11    | 52    | 8     | 1691   | 3.17            | Neutrophil  |
| 12              | 1       | 5     | 7     | 0     | 0     | 1372  | 122   | 1507   | 2.82            | NP          |
| 13              | 0       | 1149  | 43    | 3     | 0     | 0     | 0     | 1195   | 2.24            | Neutrophil  |
| 14              | 3       | 24    | 28    | 1     | 17    | 1011  | 53    | 1137   | 2.13            | Endothelia  |
| 15              | 0       | 776   | 188   | 5     | 0     | 0     | 0     | 969    | 1.81            | Erythrocyte |
| 16              | 9       | 32    | 15    | 5     | 32    | 535   | 152   | 780    | 1.46            | NP          |
| 17              | 1       | 39    | 16    | 1     | 6     | 565   | 40    | 668    | 1.25            | SMC         |
| 18              | 0       | 440   | 189   | 0     | 0     | 0     | 0     | 629    | 1.18            | Erythrocyte |
| 19              | 1       | 109   | 49    | 1     | 0     | 123   | 23    | 306    | 0.57            | Macrophage  |
| Sum             | 5340    | 9339  | 7120  | 7206  | 5376  | 11346 | 7669  | 53396  | 100.00          |             |
| Proposition (%) | 10.00   | 17.49 | 13.33 | 13.50 | 10.07 | 21.25 | 14.36 | 100.00 |                 |             |

**Supplementary Table 2: Information of si-RNA target sequence**

| Species | Si-RNA    | Target sequence      |
|---------|-----------|----------------------|
| Human   | Si-SRGN_1 | GACCAATGTTCTGAACTACT |
| Human   | Si-SRGN_2 | CCAGACAGTAATTCTGCAA  |
| Human   | Si-SRGN_3 | GTCTGAGGACTGACCTTTT  |
| Human   | Si-P65_1  | GCTGCAGTTTGATGATGAA  |
| Human   | Si-P65_1  | GCCCTATCCCTTTACGTCA  |
| Human   | Si-P65_1  | GGACATATGAGACCTTCAA  |

**Supplementary Table 3: Supplementary Antibodies and dilution information**

| Antibody                | Source                       | Cat# No.                    | WB      | IHC   | IF    |
|-------------------------|------------------------------|-----------------------------|---------|-------|-------|
| <b>Primary antibody</b> |                              |                             |         |       |       |
| UBE2C                   | Bioss Antibodies             | bs-8357R                    |         | 1:100 |       |
| FBLN1                   | Bioss Antibodies             | bs-0809R                    |         | 1:100 | 1:100 |
| CHI3L2                  | Bioss Antibodies             | bs-12358R                   |         | 1:100 |       |
| DKK1                    | Bioss Antibodies             | bs-2162R                    |         | 1:100 |       |
| MSMO1                   | Abcam                        | ab203587                    |         | 1:200 |       |
| CP                      | Bioss Antibodies             | bs-2373R                    |         | 1:100 |       |
| SRGN                    | Santa Cruz                   | HPA000759                   |         | 1:200 | 1:100 |
| SRGN                    | Abcam                        | ab156991<br>(not available) | 1:1000  |       |       |
| SRGN                    | Sigma-Aldrich                | SAB2103016                  | 1:1000  |       |       |
| COL 1                   | Bioss Antibodies             | bs-10423R                   |         | 1:100 | 1:100 |
| COL 2                   | Cell Signaling<br>Technology | 13141                       |         |       |       |
| ACAN                    | Cell Signaling<br>Technology | 3033                        |         | 1:100 | 1:100 |
| IL-1 $\beta$            | Abcam                        | ab254360                    | 1:1000  |       | 1:50  |
| IL-1 $\beta$            | Abcam                        | ab283818                    |         | 1:200 |       |
| CCL3                    | Abcam                        | ab259372                    | 1:1000  | 1:200 | 1:500 |
| TNF- $\alpha$           | Abcam                        | ab183218                    | 1:1000  |       |       |
| TNF- $\alpha$           | Abcam                        | ab1793                      |         | 1:200 | 1:100 |
| IKB $\alpha$            | Abcam                        | ab32518                     | 1:1000  |       |       |
| p- IKB $\alpha$         | Abcam                        | ab133462                    | 1: 1000 |       |       |
| pan-AKT                 | Abcam                        | ab8805                      | 1: 1000 |       |       |
| p-AKT                   | Abcam                        | ab8933                      | 1: 1000 |       |       |
| Smad2                   | Abcam                        | ab40855                     | 1: 1000 |       |       |
| p-Smad2                 | Abcam                        | ab280888                    | 1: 1000 |       |       |

|                               |                  |            |         |             |
|-------------------------------|------------------|------------|---------|-------------|
| Smad3                         | Abcam            | ab40854    | 1: 1000 |             |
| p-Smad3                       | Abcam            | ab52903    | 1: 1000 |             |
| ERK1/2                        | Abcam            | ab184699   | 1: 1000 |             |
| p-ERK1/2                      | Abcam            | ab201015   | 1: 1000 |             |
| p65                           | Abcam            | ab16502    | 1:1000  |             |
| p-p65                         | Santa Cruz       | sc-136548  | 1:1000  | 1:100       |
| p50/p105                      | Abcam            | ab305263   | 1: 1000 |             |
| p52/ p100                     | Santa Cruz       | sc-7386    | 1: 1000 |             |
| cRel                          | Abcam            | ab133251   | 1: 1000 |             |
| RelB                          | Abcam            | ab33907    | 1:1000  |             |
| F4/80                         | Bioss Antibodies | bsm-34028M |         | 1:100 1:100 |
| CD86                          | Bioss Antibodies | bs-1035R   |         | 1:100       |
| Beta Tubulin (HRP conjugated) | Bioss Antibodies | bsm-52847R | 1:5000  |             |

## Flow Cytometry

### Antibody

|            |             |            |
|------------|-------------|------------|
| CD11c-PC7  | eBioScience | 25-0114-81 |
| CD86-PB450 | eBioScience | 48-0862-80 |

## Secondary

### antibody

|                                            |                              |       |        |
|--------------------------------------------|------------------------------|-------|--------|
| Anti-rabbit IgG,<br>HRP-linked<br>Antibody | Cell Signaling<br>Technology | 7074S | 1:5000 |
| Anti-mouse IgG,<br>HRP-linked<br>Antibody  | Cell Signaling<br>Technology | 7076S | 1:5000 |

|                                                                                                      |                             |         |        |
|------------------------------------------------------------------------------------------------------|-----------------------------|---------|--------|
| Goat anti-Rabbit<br>IgG (H+L) Cross-<br>Adsorbed<br>Secondary<br>Antibody, Alexa<br>Fluor™ 488       | Thermo Fisher<br>Scientific | A-11008 | 1:2000 |
| Goat anti-mouse<br>IgG (H+L)<br>Secondary<br>Antibody,<br>DyLight™ 488                               | Thermo Fisher<br>Scientific | A-10680 | 1:2000 |
| Goat anti-Rabbit<br>IgG (H+L) Highly<br>Cross-Adsorbed<br>Secondary<br>Antibody, Alexa<br>Fluor™ 555 | Thermo Fisher<br>Scientific | A-21429 | 1:2000 |
| Goat anti-Rabbit<br>IgG (H+L) Cross-<br>Adsorbed<br>Secondary<br>Antibody, Alexa<br>Fluor™ 594       | Thermo Fisher<br>Scientific | R-37117 | 1:2000 |
| Goat anti-Rabbit<br>IgG (H+L) Highly<br>Cross-Adsorbed<br>Secondary<br>Antibody, Alexa<br>Fluor™ 647 | Thermo Fisher<br>Scientific | A-21245 | 1:2000 |

**Supplementary Table 4: Main Reagents information**

| <b>Reagents</b>                               | <b>Source</b>                        | <b>Cat# No.</b> | <b>Application</b>           |
|-----------------------------------------------|--------------------------------------|-----------------|------------------------------|
| PrimeScript™ II Reverse Transcriptase         | TaKaRa                               | 2690A           | RT-qPCR                      |
| TB Green® Premix Ex Taq™ II (Tli RNaseH Plus) | TaKaRa                               | RR820A          | RT-qPCR                      |
| DAKO REAL™ EnVision™ Detection system         | DAKO                                 | K5007           | IHC                          |
| Lipofectamine™ 3000 Transfection Reagent      | Invitrogen, Thermo Fisher Scientific | L3000015        | Si-RNA, plasmid transfection |
| Recombined human SRGN protein                 | R&D                                  | 10190-SN-050    |                              |
| Daphtetin                                     | Abcam                                | ab143113        |                              |
| Human IL-1 beta/IL-1F2 Quantikine ELISA Kit   | R&D Systems                          | MLB00C          | ELISA                        |
| Human TNF-alpha Quantikine ELISA Kit          | R&D Systems                          | DTA00D          | ELISA                        |
| Human CCL3/MIP-1 alpha Quantikine ELISA Kit   | R&D Systems                          | DMA00           | ELISA                        |

## Supplementary Table 5: Cell line authentication report of RAW264.7

The STR typing results of RAW264.7 cells and their matching information in the cell repository\*

| Locus          | Cell Sample**    |                  | RAW264.7 in Cellosaurus release 43.0 |
|----------------|------------------|------------------|--------------------------------------|
| <b>4-2</b>     | 246.91<br>[22.3] |                  | 223                                  |
| <b>5-5</b>     | 335.85<br>[14]   |                  | 14                                   |
| <b>6-4</b>     | 299.98<br>[18]   |                  | 18                                   |
| <b>6-7</b>     | 336.28<br>[12]   |                  | 12                                   |
| <b>9-2</b>     | 222.32<br>[15]   |                  | 15                                   |
| <b>12-1</b>    | 225.93<br>[16]   |                  | 16                                   |
| <b>15-3</b>    | 201<br>[22.3]    | 205.05<br>[23.3] | 22.3                                 |
| <b>18-3</b>    | 161.17<br>[18]   |                  | 18                                   |
| <b>X-1</b>     | 396.95<br>[24]   |                  | 24                                   |
| <b>D4S2408</b> | /                |                  | /                                    |

\*Cell line STR authentication report No. 20210203shu-2; Based on the cell DNA typing results, the identification of this cell strain is confirmed to be of murine origin. The DNA typing showed a close match (EV value 0.9412) with a cell line found in the cell repository, identified as ImKC/RAW264.7, with the accession number CVCL HF55/CVCL 0493. No multiple allele phenomena were observed, and there was no evidence of human cross-contamination. (The D4S2408 locus is a human-specific marker used to detect potential human contamination in the cell line.)

\*\*Sample name: RAW264.7; Date: Feb. 3,2021 ; Sample treatment: DNA extraction was performed from a cell pellet containing  $1 \times 10^6$  cells using Axygen's genome extraction kit. The extracted DNA was then subjected to amplification following the 10-STR amplification protocol,

and the STR loci, along with the gender gene Amelogenin, were subsequently analyzed using the ABI 3730XL genetic analyzer.

## Supplementary figures

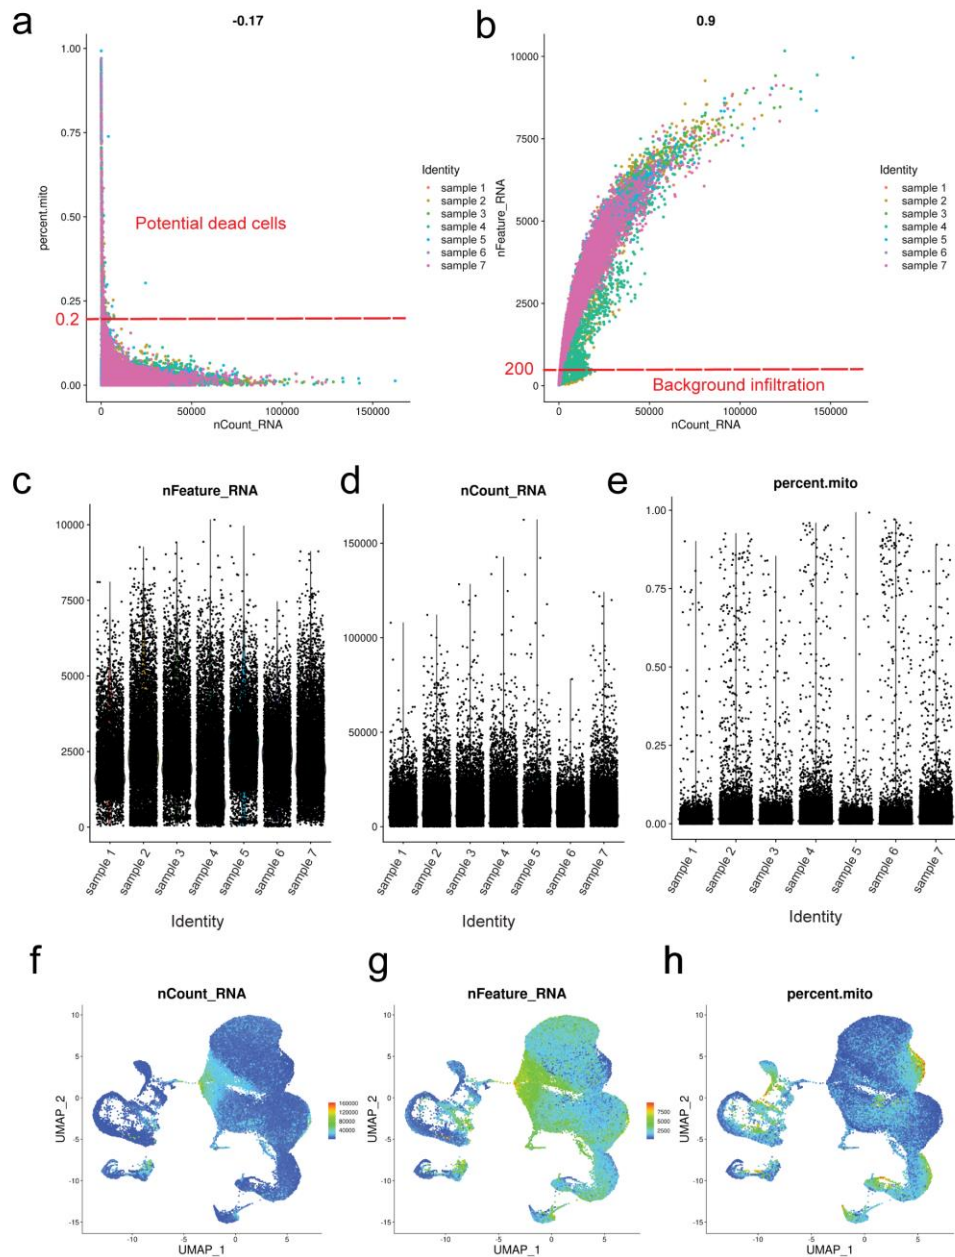

**Supplementary Figure 1. Single-cell sequencing of cell infiltration.** By visualizing the gene count distribution plots and unique molecular identifier (UMI) count distribution plots, the expression profile and gene abundance in all cells in the sample can be assessed.

**(a and b)** Correlation analysis of UMI with genes and mitochondrial proportion. **(c-h)**

Violin and UMAP plots of all single-cell transcriptomes colored by individual participants.



**Supplementary Figure 2. Cell clustering analysis** (a) Umap of 20 cell populations in the cell clustering analysis. (b) Heatmap revealing the scaled expression of differentially expressed genes for each cell population.

a

## GO analysis of Pro-NPCs(UBE2C+)

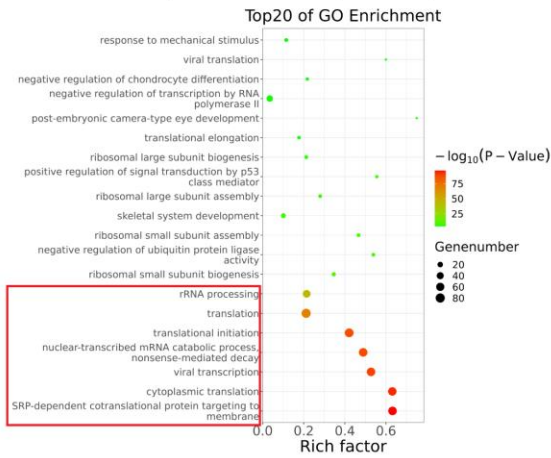

b

## GO analysis of Fibro-NPCs(FBLN1+)

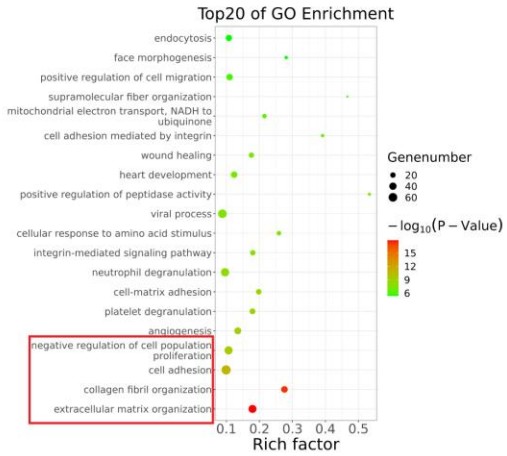

c

## GO analysis of IR-NPCs(CHI3L2+)

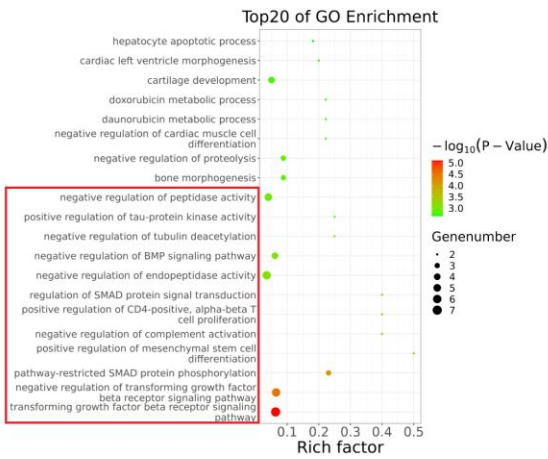

d

## GO analysis of Met-NPCs(DKK1+)

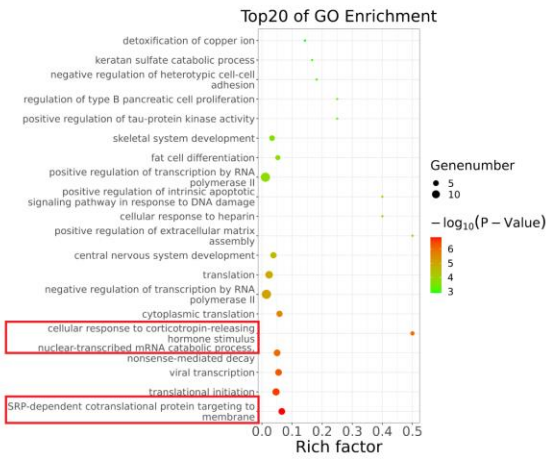

e

## GO analysis of Adh-NPCs(CP+)

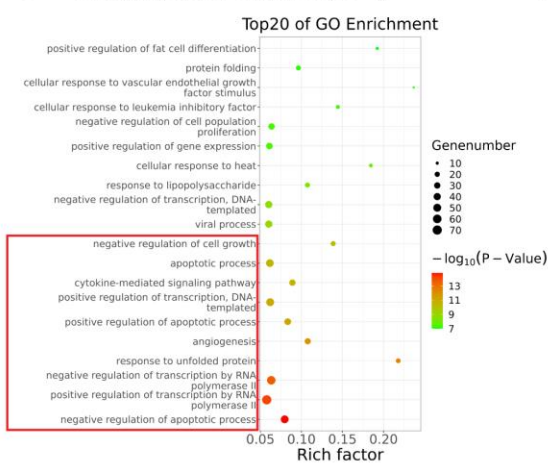

f

## GO analysis of SR-NPCs(MSMO1+)

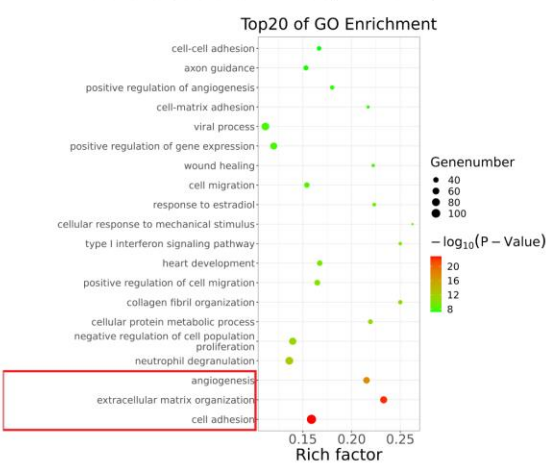

**Supplementary Figure 3. GO analysis of the six subpopulations of NPCs (a-f)** GO analysis of the six subpopulations of NPCs in scRNA-seq results.

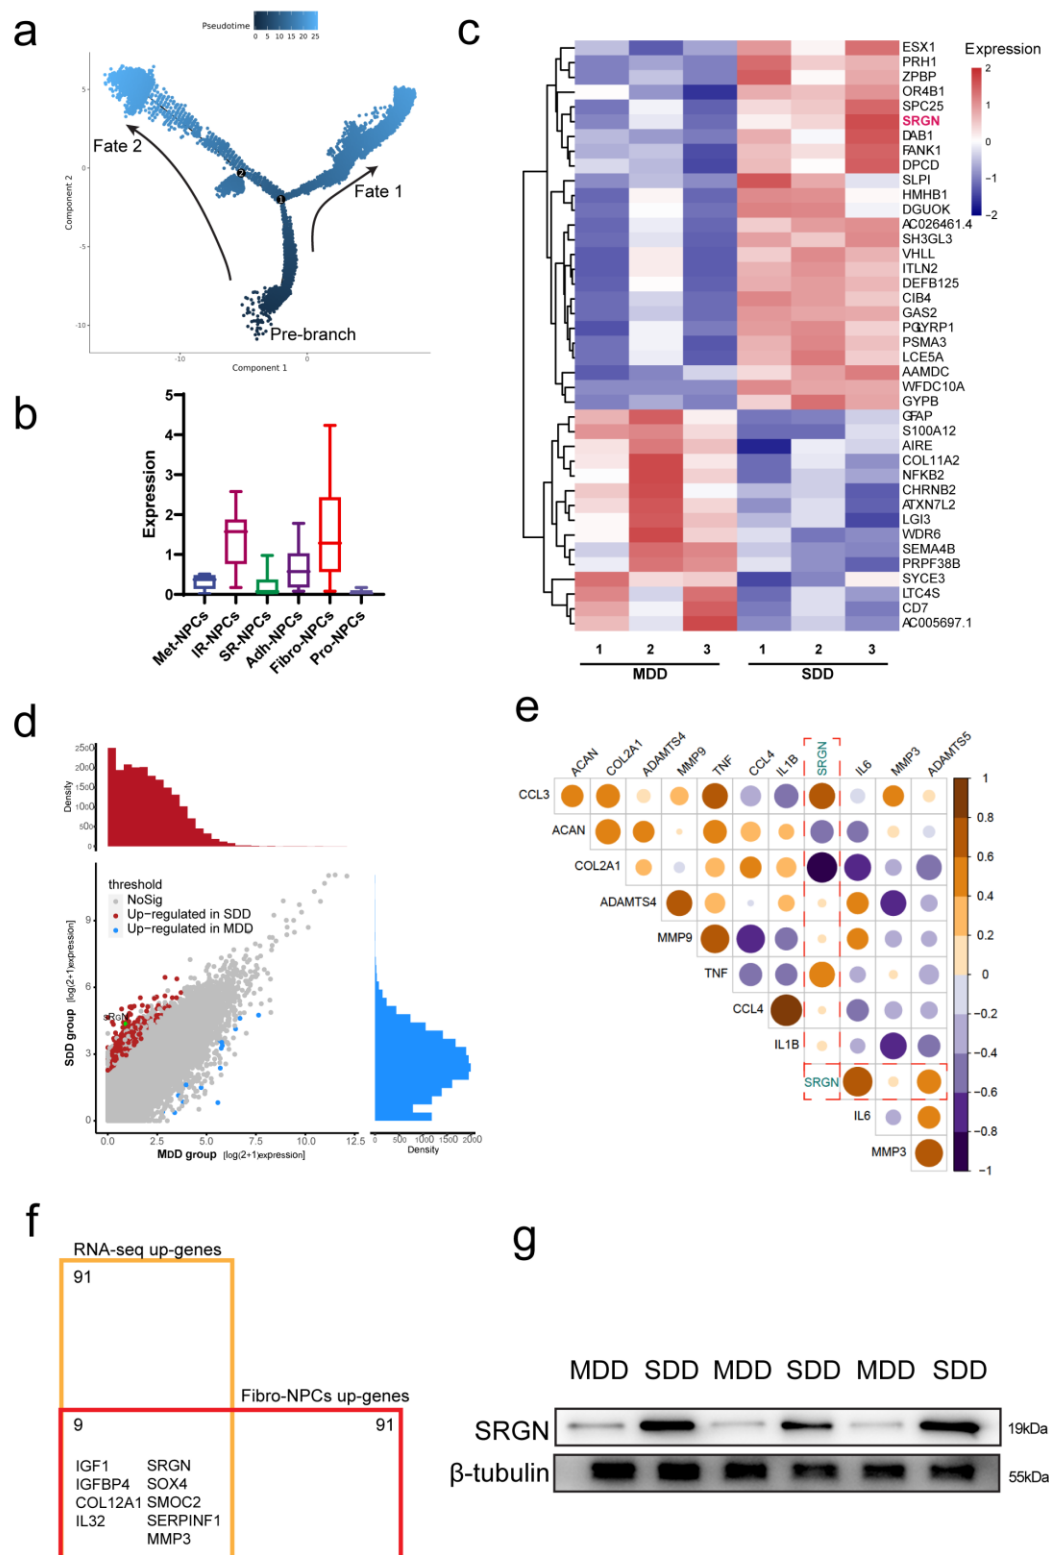

**Supplementary Figure 4. SRGN is a potential biomarker of late-stage NPCs (a)**

Monocle 2 pseudotime trajectory analysis and state distribution. **(b)** Box plot of

SRGN gene expression in each subcluster. **(c and d)** Heatmap and volcano plot of 6

human NP samples (mild degenerative disc [MDD]: n = 3, severe degenerative disc [SDD]: n = 3). **(e)** Correlation analysis of SRGN and IVDD-related markers. **(f)** Venn diagram of the intersection of the top 100 upregulated genes in RNA-Seq of human NP tissues and the top 100 significant marker genes in Fibro-NPCs. **(g)** Western blotting analysis of SRGN expression in normal NP compared to degenerated NP samples. M: MDD group; S: SDD group.

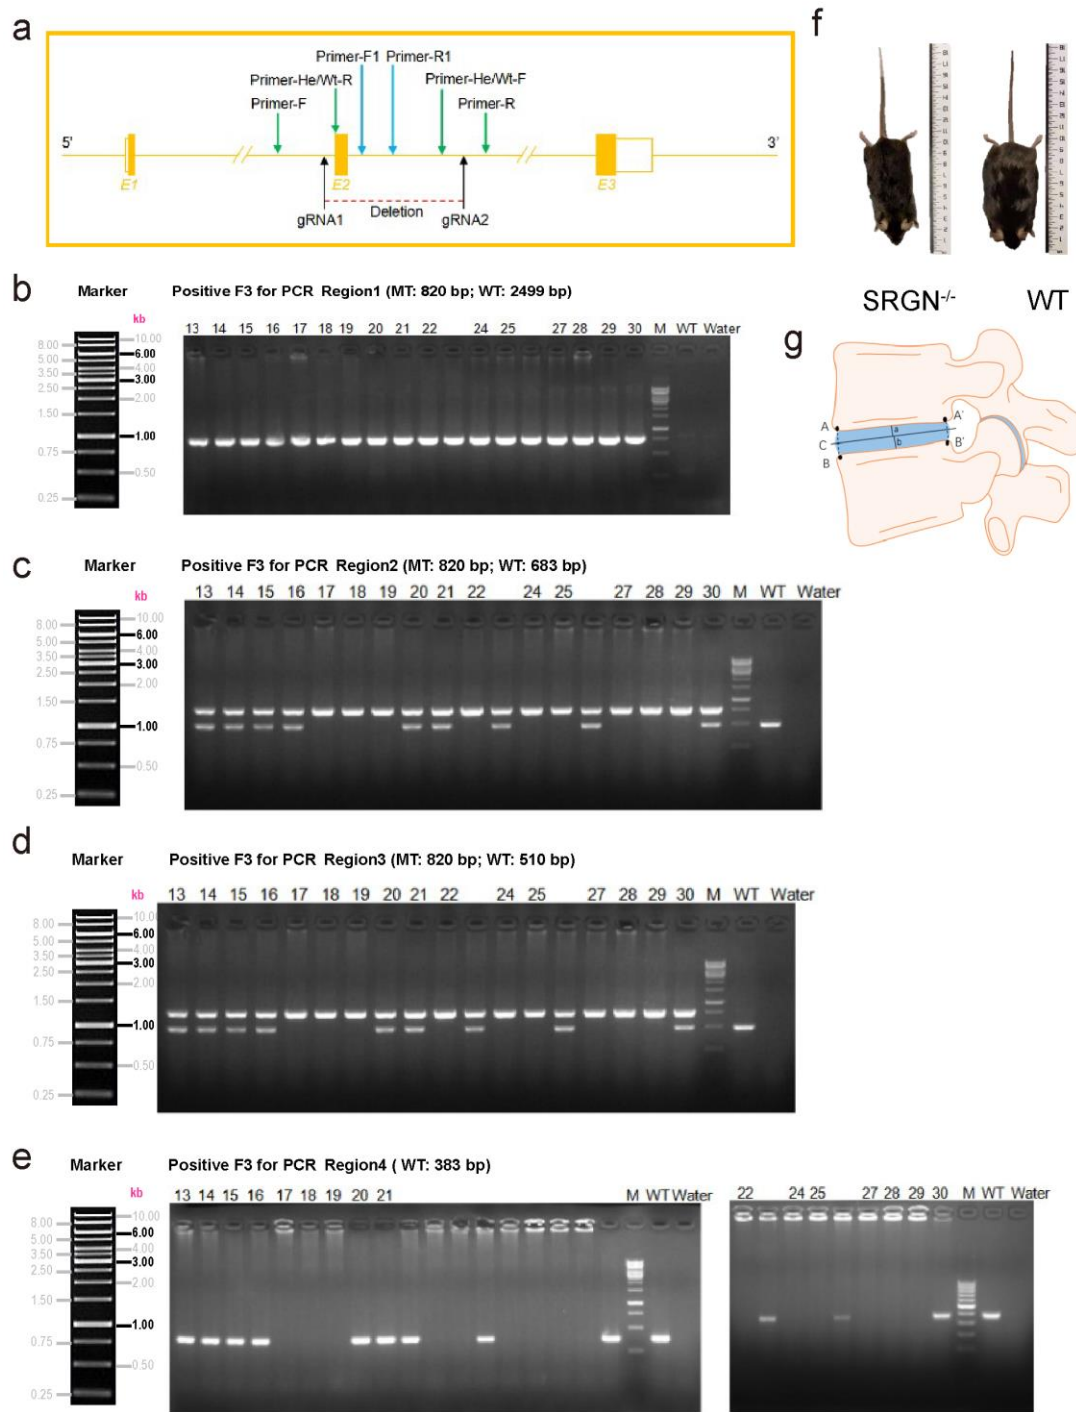

**Supplementary Figure 5. Successful creation of SRGN KO mice** (a) Schematic diagram illustrating the targeting strategy. (b- e) PCR screening results of F3 animals from 4 different regions to identify KO mice and WT mice. (PCR primer sequences are shown at the end of the document. MT: mutant allele.) (f) The appearance of male KO mice and WT mice. (g) The method of intervertebral disk height measurement was as follows: Determine the four corners of the two adjacent

vertebral bodies (A, A', B, B') and draw a straight line through the midpoints of A and B and the midpoints of A' and B', namely, the bisector (line C). The vertical distance between A, A' and B and the midpoint of B' to line C is A and B, respectively, and the sum of the two ( $A + B$ ) is the disc height.

## Sequence of gRNA and PCR primers

### 1.gRNA target sequence

gRNA1 (matches reverse strand of gene): TTGTACATTTGGCAGGTCGCAGG

gRNA2 (matches forward strand of gene): CACGGAATAAGTTGTTGCCTGG

### 2.PCR screening

#### PCR primers 1 (annealing temperature 65.0 °C):

Forward primer-F: GTGTCTGTCACAGGCATTGTTGG

Reverse primer-R: TACTGATGGGAGATGCCAGACCC

Mutant allele: 820 bp

Wildtype allele: 2499 bp

#### PCR region 2 (annealing temperature 60.0 °C):

Mouse Srgn-F: GTGTCTGTCACAGGCATTGTTGG

Mouse Srgn-R: TACTGATGGGAGATGCCAGACCC

Mouse Srgn-He/Wt-R: GATAACCTGTGCGAACAAGGAAC

Heterozygote: 820 bp and 683 bp;

Homozygous: 820 bp

Wildtype: 683 bp

#### PCR region 3 (annealing temperature 60.0 °C):

Mouse Srgn-F: GTGTCTGTCACAGGCATTGTTGG

Mouse Srgn-R: TACTGATGGGAGATGCCAGACCC

Mouse Srgn-He/Wt-F: ACCACCACACAATGATATACAAACAGAT

Heterozygous: 820 bp and 510 bp;

Homozygous: 820 bp

Wildtype: 510 bp

#### PCR region 4 (annealing temperature 60.0 °C):

Mouse Srgn-F1: ATAAGCCTTGGAAGTATTTGCCC

Mouse Srgn-R1: GAAGCAAAGTCAAAGGGTCCATT

Heterozygous: 383 bp;

Homozygous: 0 bp

Wildtype: 383 bp

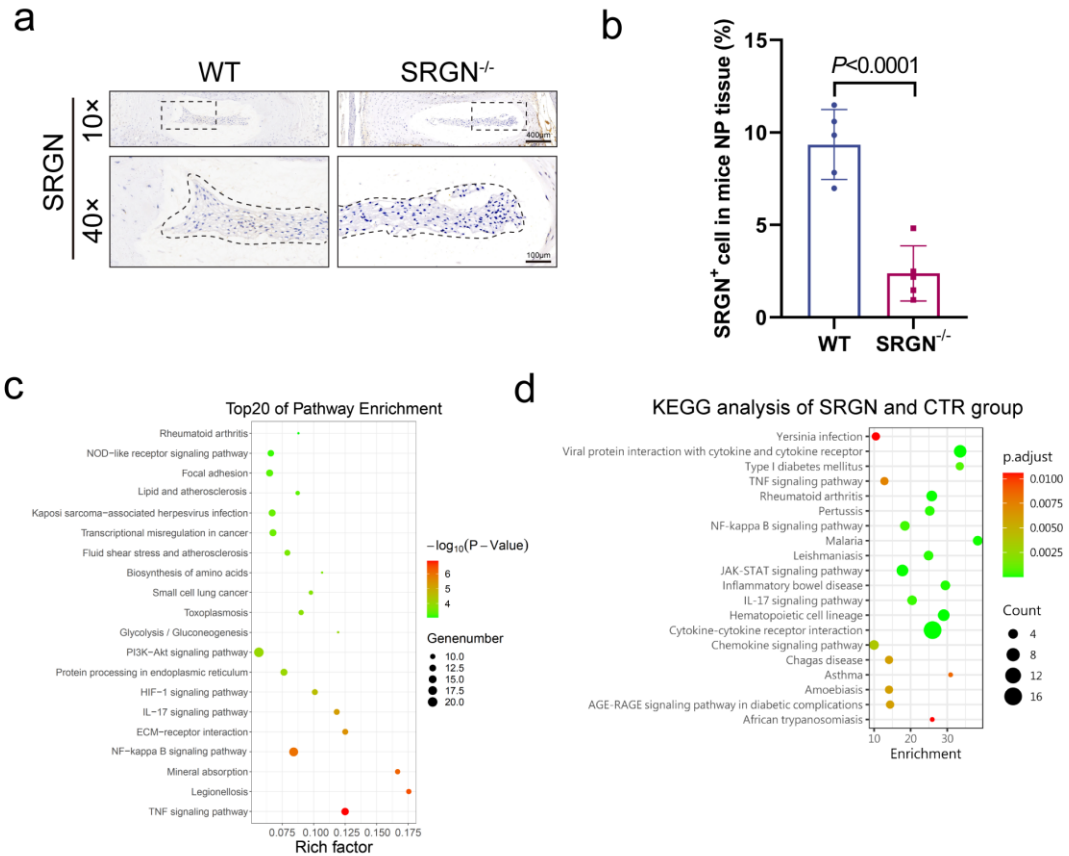

**Supplementary Figure 6. SRGN regulates the local inflammatory response through the NF- $\kappa$ B signaling pathway (a and b)** The IHC staining and analysis of WT and *Srgn*<sup>-/-</sup> mouse IVDs. (c) KEGG analysis of the top 20 upregulated genes in SDD based on RNA-seq. (d) KEGG analysis of SRGN-treated NPC inflammatory cytokines from the cytokine array. Data are presented as mean  $\pm$  SD. Statistical significance was determined by two-tailed t test. Source data are provided as a Source Data file.

A

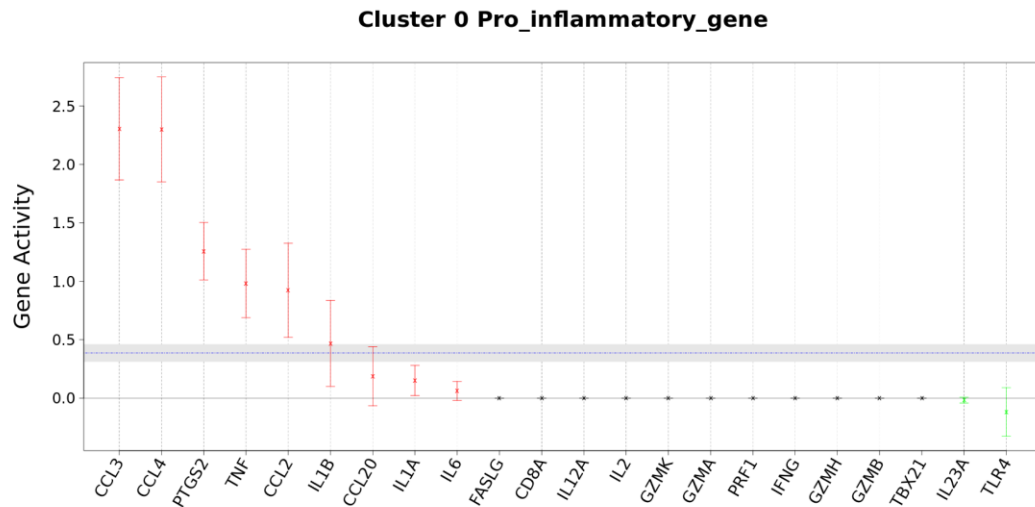

B

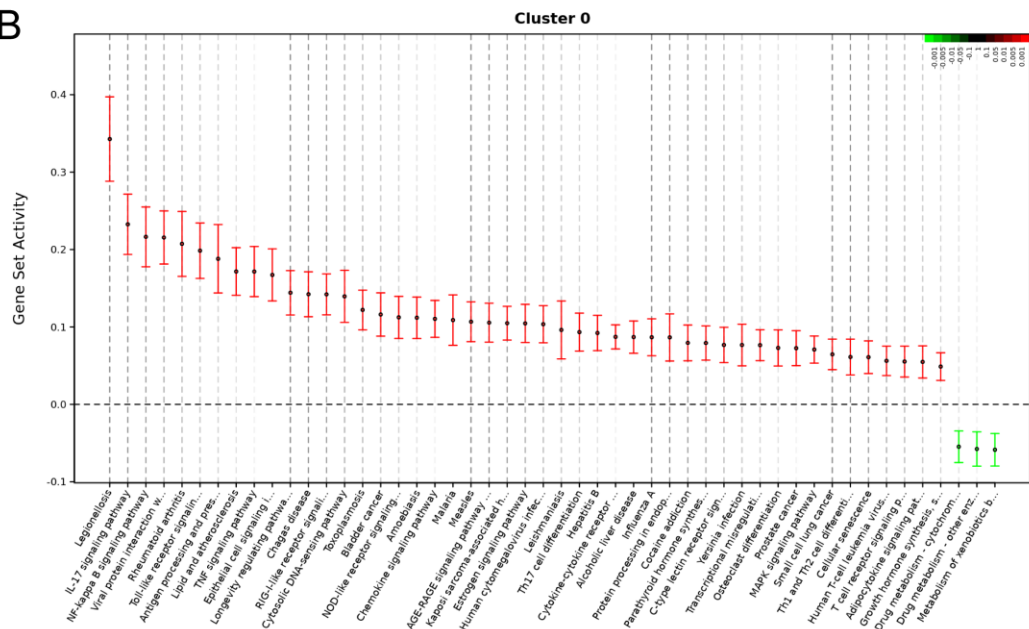

**Supplementary Figure 7. SRGN increases macrophage infiltration by activating the NF- $\kappa$ B signaling pathway.** (a) Proinflammatory gene set expression in cluster 0 indicates that CCL3, IL-1 $\beta$  and TNF- $\alpha$  gene expression is increased significantly. (b) QuSage analysis showed that the NF- $\kappa$ B signaling pathway is significant in cluster 0 macrophages.

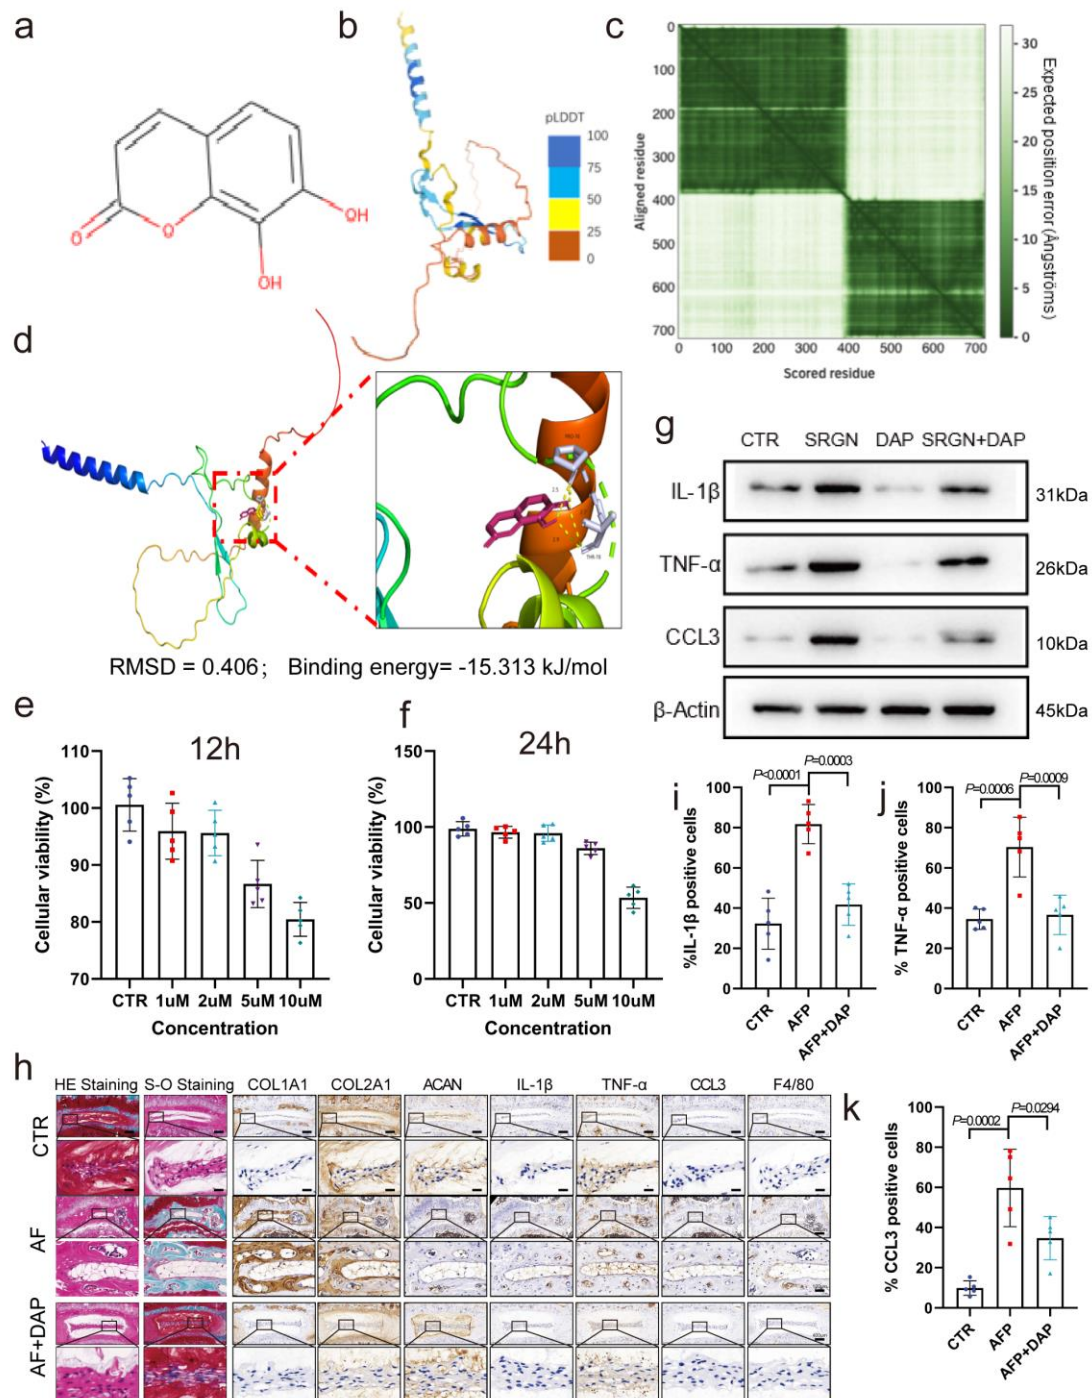

**Supplementary Figure 8. DAP attenuates the IVD local inflammatory response to alleviate IVDD.**

(a) The structure of DAP. (b) The predicted 3D structure of SRGN by AlphaFold 2.

(c) Predicted aligned error of the SRGN 3D model: The color at position (x, y)

indicates AlphaFold's expected position error at residue x when the predicted and true

structures are aligned on residue y. (d) Simulation of predicted docking with SRGN

and DAP (RMSD = 0.406; estimated free energy of binding = -15.313 kJ/mol). **(e and f)** CCK-8 assay of DAP and 2  $\mu$ M with 24 h is the best treated concentration and time. **(g)** Western blotting analysis of IL-1 $\beta$ , TNF- $\alpha$ , and CCL3 in NPCs treated with SRGN and DAP. **(h)** HE, SO and IHC staining of COL1A1, COL2A1, ACAN, IL-1 $\beta$ , TNF- $\alpha$ , CCL3, and F4/80 with histologic score analysis of IL-1 $\beta$ +, TNF- $\alpha$ +, CCL3+, and F4/80+ cells in AF and AF plus DAP mice at 8 weeks after the operation (original magnification 100 $\times$ , 400 $\times$ , scale bar = 400  $\mu$ m, 100  $\mu$ m). Data are represented as mean  $\pm$  standard deviation. *P* values were determined by one-way ANOVA with post-hoc Bonferroni correction or Kruskal-Wallis H test with a Dunn's correction as appropriate.

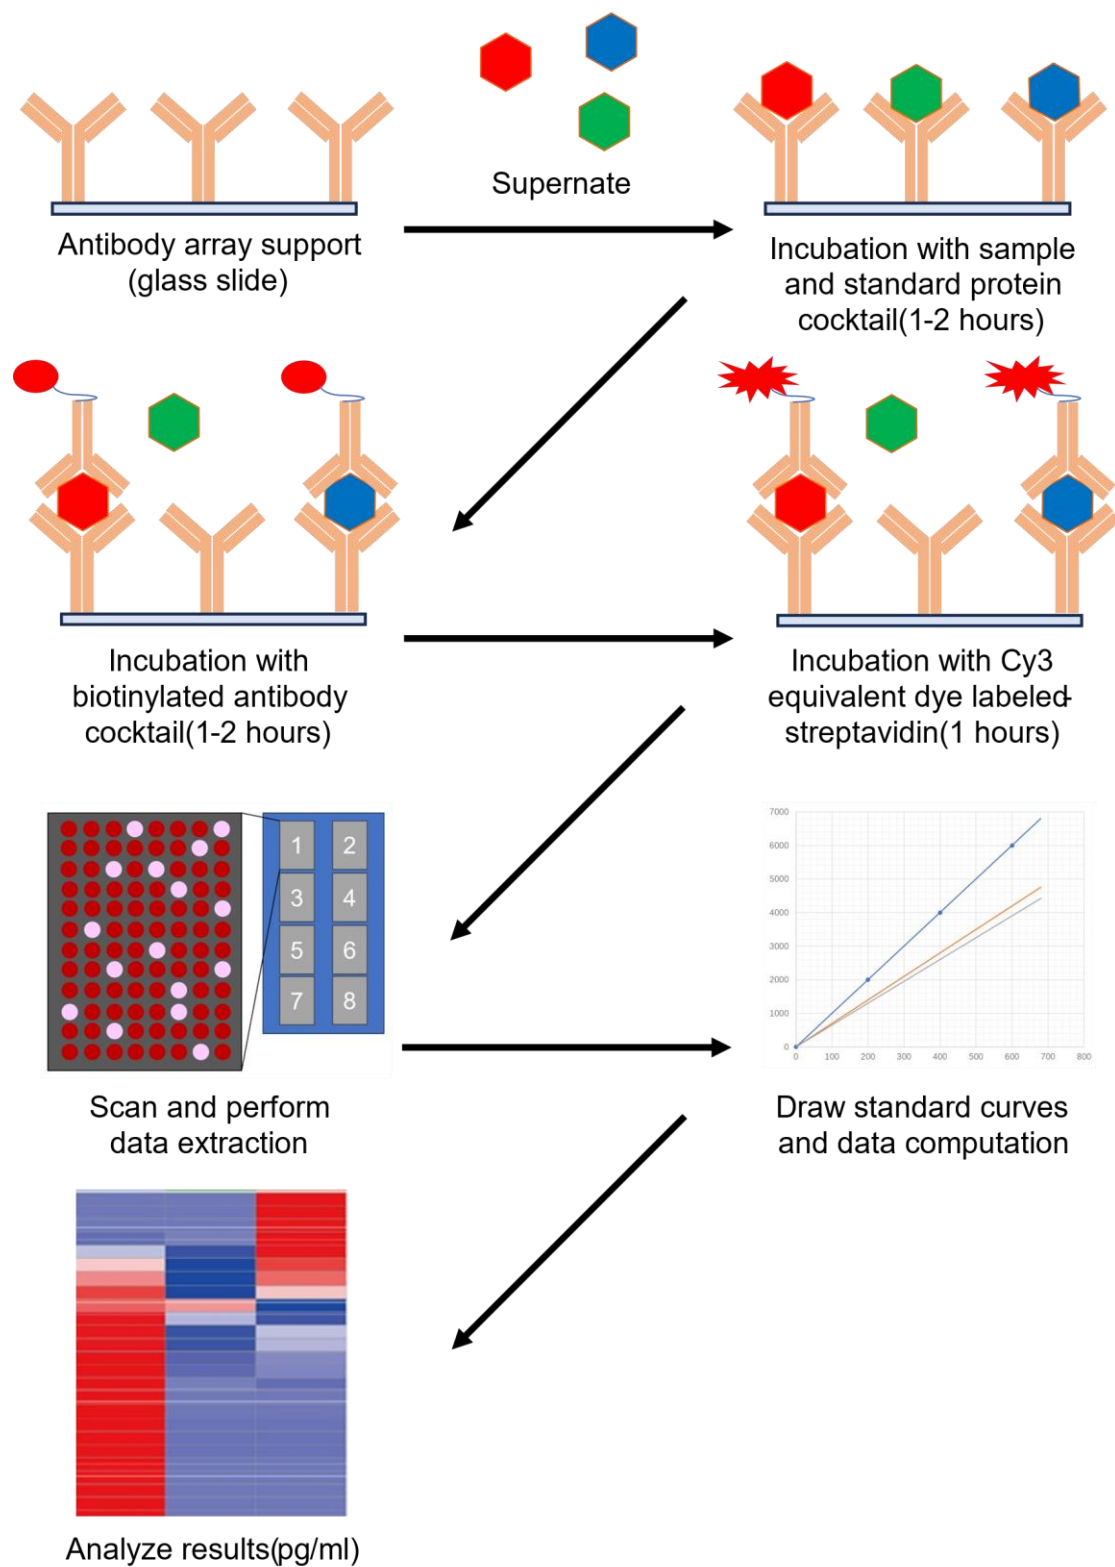

**Supplementary Figure 9. Schematic diagram of the quantitative measurement of 40 human cytokines.**

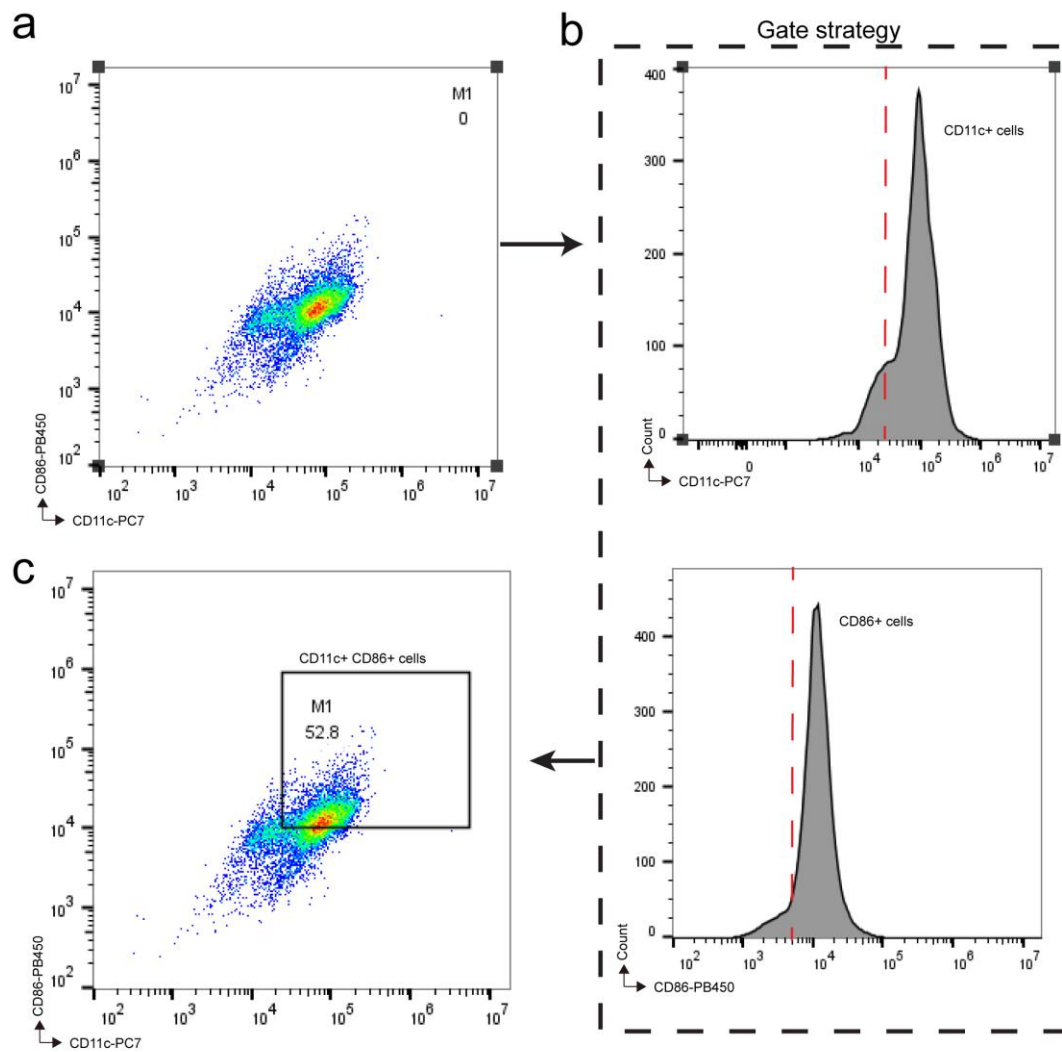

**Supplementary Figure 10. Gating strategy for screening CD11c and CD86 positive macrophages.**
